# Supplementary material for: Study of the kinetics and mechanism of ferrocene-tripeptide inhibiting insulin aggregation
Source: Royal Society of Chemistry journal article supplement (doi:10.1039/d2tb01085b), 2022-01-01
Supplement: d2tb01085b1.pdf [file d2tb01085b1.pdf]

## Supporting Information

# Study on the Kinetics and Mechanism of Ferrocene-Triptide Inhibiting Insulin Aggregation

Jiaying Zhang,<sup>a, †</sup> Pin Yao,<sup>a, †</sup> Shengping You,<sup>\*, a, d</sup> Wei Qi,<sup>\*, a, b, c, d</sup>, Rongxin Su,<sup>a, b, c, d</sup> and Zhimin He<sup>a, d</sup>

*Chemical Engineering Research Centre, School of Chemical Engineering and Technology, Tianjin University, Tianjin 300072, PR China*

*State Key Laboratory of Chemical Engineering, Tianjin University, Tianjin 300072, PR China*

*Collaborative Innovation Centre of Chemical Science and Engineering (Tianjin), Tianjin 300072, P. R. China.*

*Tianjin Key Laboratory of Membrane Science and Desalination Technology, Tianjin University, Tianjin 300072, PR China*

† These authors contributed equally to the work.

\* Corresponding authors:

E-mail addresses: [qiwei@tju.edu.cn](mailto:qiwei@tju.edu.cn) (Wei Qi), [ysp@tju.edu.cn](mailto:ysp@tju.edu.cn) (Shengping You).

## 1. Supplementary tables

**Table S1.** Effects of Fc-peptides on the kinetic parameters of insulin fibrillation in 20% (v/v) acetic acid solution. The concentration of insulin was 2 mg/mL.

|                  | Fibril Formation  |                               |                                       |
|------------------|-------------------|-------------------------------|---------------------------------------|
|                  | Lag time (h)      | Fluorescence Intensity (a.u.) | Amyloidogenic extent (%) <sup>a</sup> |
| Insulin          | 62.9              | 138.0                         | 100                                   |
| Insulin + Fc-FFY |                   |                               |                                       |
| 100 $\mu$ M      | 89.9              | 58.8                          | 42.6                                  |
| 200 $\mu$ M      | 135.1             | 23.7                          | 17.2                                  |
| 300 $\mu$ M      | n.a. <sup>b</sup> | 0.8                           | 0.6                                   |
| Insulin + Fc-FFF |                   |                               |                                       |
| 100 $\mu$ M      | 98.4              | 52.5                          | 38                                    |
| 200 $\mu$ M      | 120.0             | 28.2                          | 20.4                                  |
| 300 $\mu$ M      | n.a.              | 0.96                          | 0.7                                   |
| Insulin + Fc-FFD |                   |                               |                                       |
| 100 $\mu$ M      | 90.0              | 67.13                         | 48.6                                  |
| 200 $\mu$ M      | 113.2             | 42.4                          | 30.7                                  |
| 300 $\mu$ M      | 122.0             | 37.4                          | 27.1                                  |
| Insulin + Fc-FFK |                   |                               |                                       |
| 100 $\mu$ M      | 90.3              | 89.0                          | 64.5                                  |
| 200 $\mu$ M      | 86.0              | 64.9                          | 47                                    |
| 300 $\mu$ M      | 91.1              | 47.7                          | 34.6                                  |

<sup>a</sup> The fluorescence intensity of insulin was set as a reference value. Amyloidogenic extent of a system was calculated by the final fluorescence intensity of the system divided by that of insulin.

<sup>b</sup> n.a. is short for not available.

**Table S2.** Sizes of insulin fibrils incubated with Fc-peptides for 156 h.

|                                 | Peptide inhibitors concentration ( $\mu\text{M}$ ) |        |        |
|---------------------------------|----------------------------------------------------|--------|--------|
|                                 | 100                                                | 200    | 300    |
| Insulin + Fc-FFY                |                                                    |        |        |
| Hydrodynamic diameter (nm)      | 490.47                                             | 248.43 | 181.60 |
| Full Width at Half Maximum (nm) | 473.66                                             | 215.66 | 101.85 |
| Insulin + Fc-FFF                |                                                    |        |        |
| Hydrodynamic diameter (nm)      | 583.37                                             | 344.55 | 284.45 |
| Full Width at Half Maximum (nm) | 313.09                                             | 369.26 | 118.68 |
| Insulin + Fc-FFD                |                                                    |        |        |
| Hydrodynamic diameter (nm)      | 523.49                                             | 442.41 | 328.68 |
| Full Width at Half Maximum (nm) | 431.13                                             | 416.98 | 102.45 |
| Insulin + Fc-FFK                |                                                    |        |        |
| Hydrodynamic diameter (nm)      | 713.88                                             | 483.25 | 349.96 |
| Full Width at Half Maximum (nm) | 529.91                                             | 370.14 | 329.60 |

## 2. Supporting figures

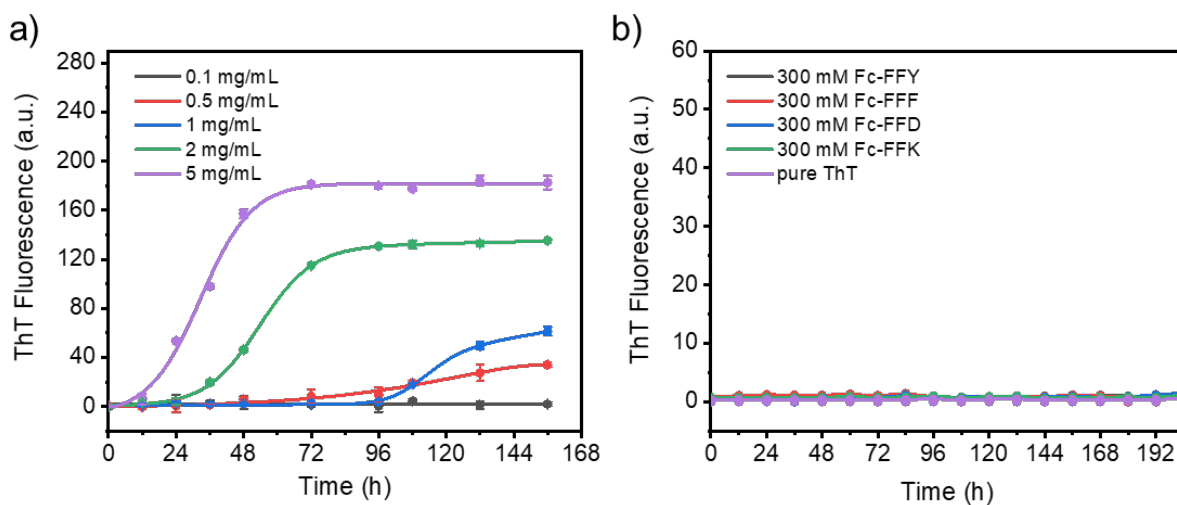

**Figure S1.** a) Fluorescence intensity of different concentrations of insulin incubated in 20% acetic acid solution at 60 °C. b) Fluorescence intensity of Fc-tripeptides and ThT incubated in 20% acetic acid solution at 60 °C.

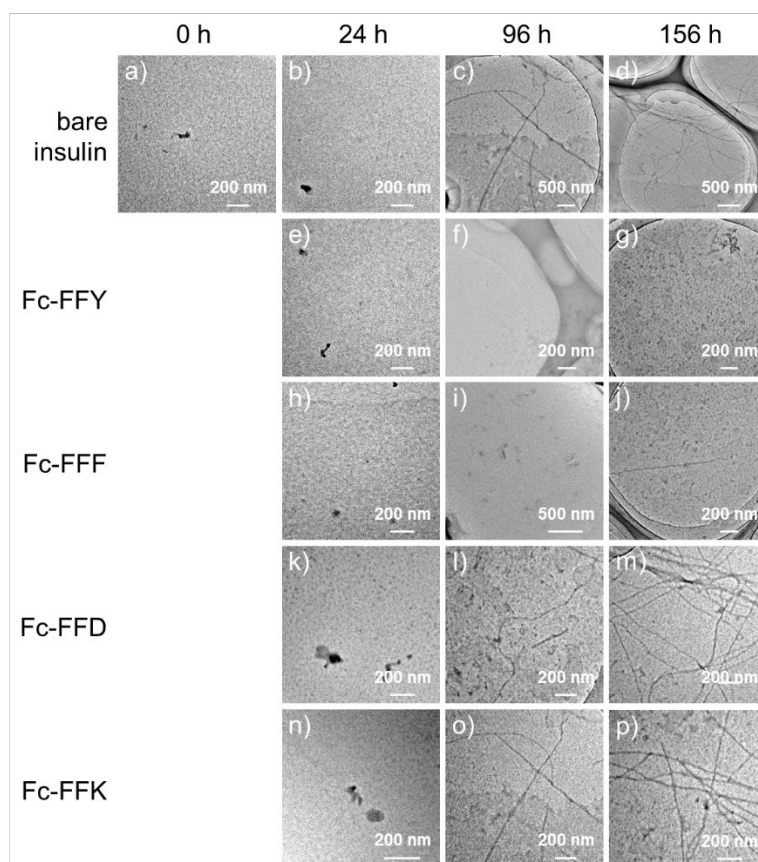

**Figure S2.** TEM images of insulin and insulin/Fc-tripeptides incubated for 156 h.

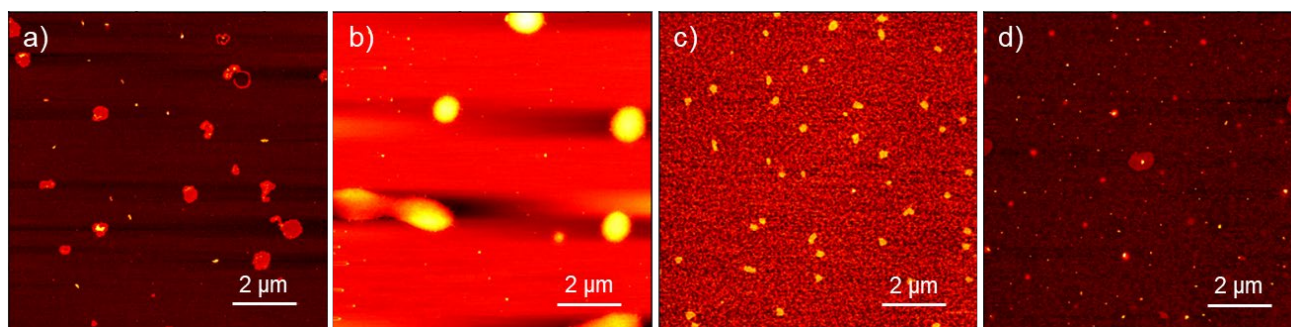

**Figure S3.** AFM images of Fc-tripeptides incubated for 156 h. (a) Fc-FFY, (b) Fc-FFF, (c) Fc-FFD or (d) Fc-FFK.

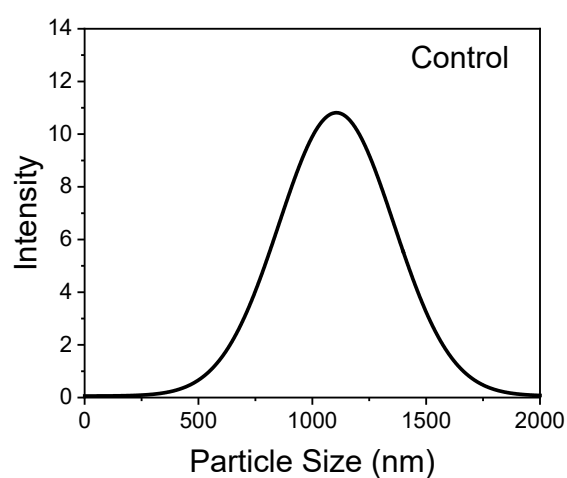

**Figure S4.** Size distribution of insulin incubated for 156 h.

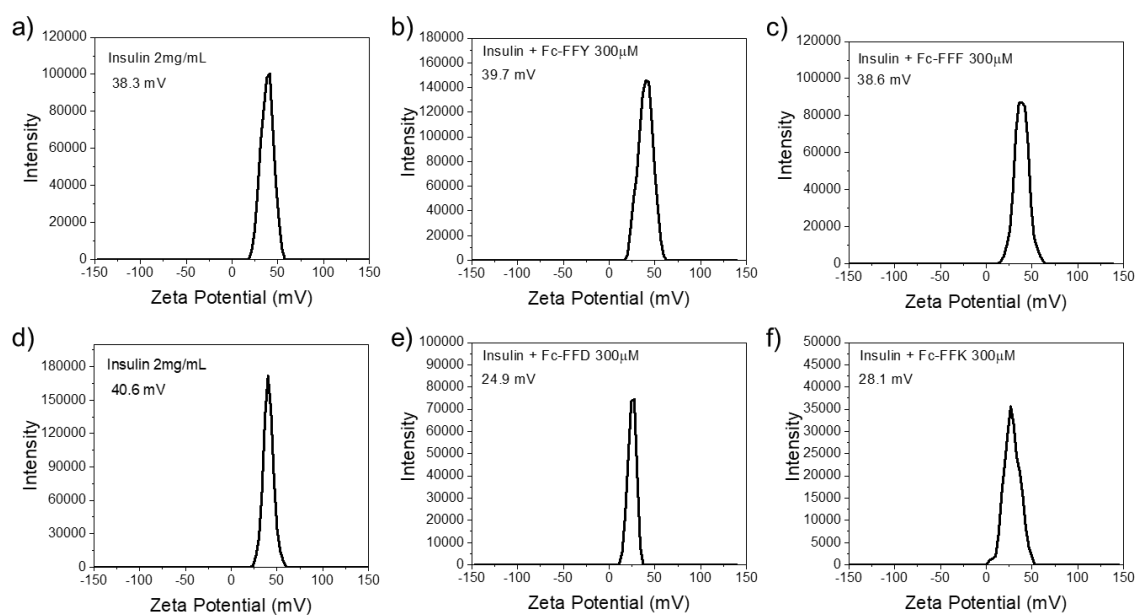

**Figure S5.** Zeta potential values of (a, d) insulin, (b) 300 μM Fc-FFY, (c) 300 μM Fc-FFF, (e) 300 μM Fc-FFD and (f) 300 μM Fc-FFK in water solution.

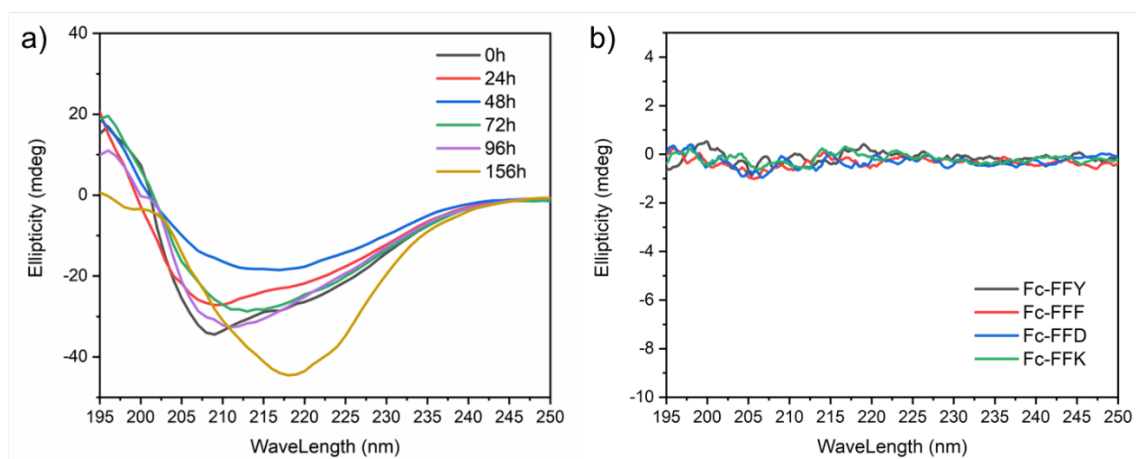

**Figure S6.** (a) CD spectrum of insulin in 20% (v/v) acetic acid solution after incubation for up to 156 h. (b) CD spectrum of the Fc-tripeptides.

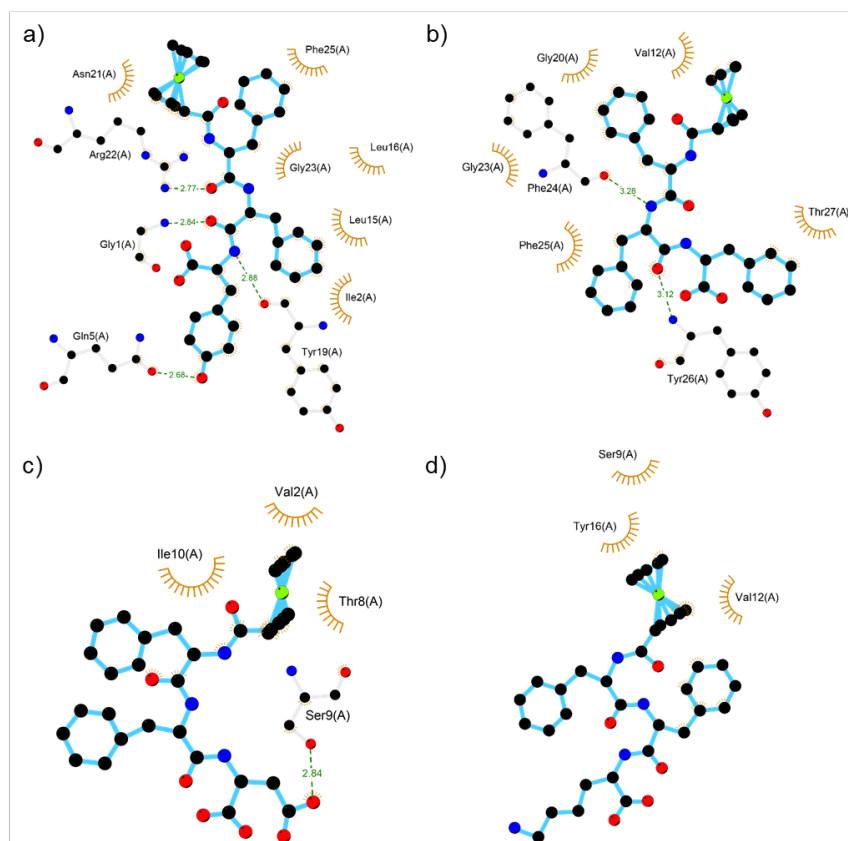

**Figure S7.** Intermolecular interactions between insulin and (a) Fc-FFY, (b) Fc-FFF, (c) Fc-FFD or (d) Fc-FFK were drawn with Ligplot+ program<sup>1</sup>. The atoms were color-coded as follows: C, black; O, red; N, blue. Bonds in Fc-tripeptides were colored cyan and those in insulin residues were colored gray. Hydrophobic interactions between Fc-tripeptides and insulins were shown in arc-shaped brown lines.

### **3. Supplementary methods**

#### **Transmission electron microscopy (TEM)**

The morphology of insulin samples incubated in the absence and presence of Fc-tripeptides were represented on a JEOL 100CX-II transmission electron microscope (JEOL Ltd, Japan) operated at an accelerating voltage of 80 kV. Each sample was diluted and dropped 10  $\mu$ L onto a carbon-coated copper grid and air-dried at room temperature. Then the grids with samples were negatively stained with 1% phosphotungstic acid solution for 4 min and examined.

#### **References**

1. R. A. Laskowski and M. B. Swindells, *J. Chem. Inf. Model.*, 2011, **51**, 2778-2786.
